# Supplementary material for: Synthesis and electrochemical characterization of hexanuclear platinum bis-pseudohalides
Source: Royal Society of Chemistry journal article supplement (doi:10.1039/c3dt50714a), 2013-01-01
Supplement: c3dt50714a.pdf [file c3dt50714a.pdf]

## Electronic Supplementary Information (ESI)

### Synthesis and Electrochemical Characterization of Hexanuclear Platinum Bis-Pseudohalides.

Martina Anselmi, Veronica Bonuccelli, Tiziana Funaioli,\* Piero Leoni,\*  
Fabio Marchetti, Lorella Marchetti, Swagat Kumar Mohapatra, Marco Pasquali.

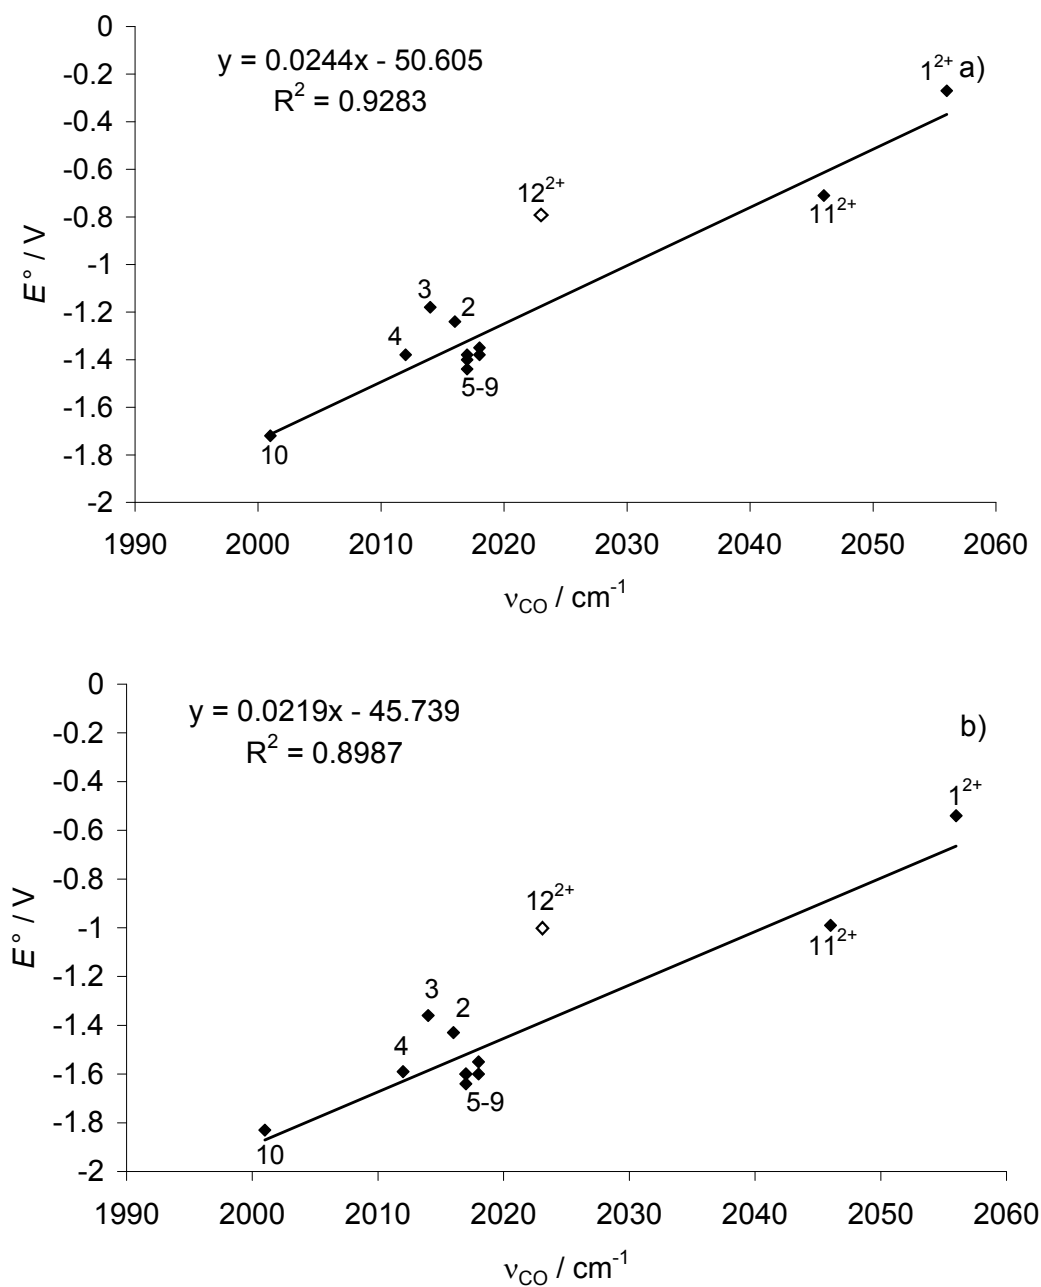

Figure 1S. Correlation between the experimental CO stretching frequencies and the a) first and b) second reduction potential values for clusters  $[\{\text{Pt}_6\}\text{L}_2]^{n+}$ .  $\mathbf{12}^{2+}$  has been excluded from the regression and is shown as open symbol.

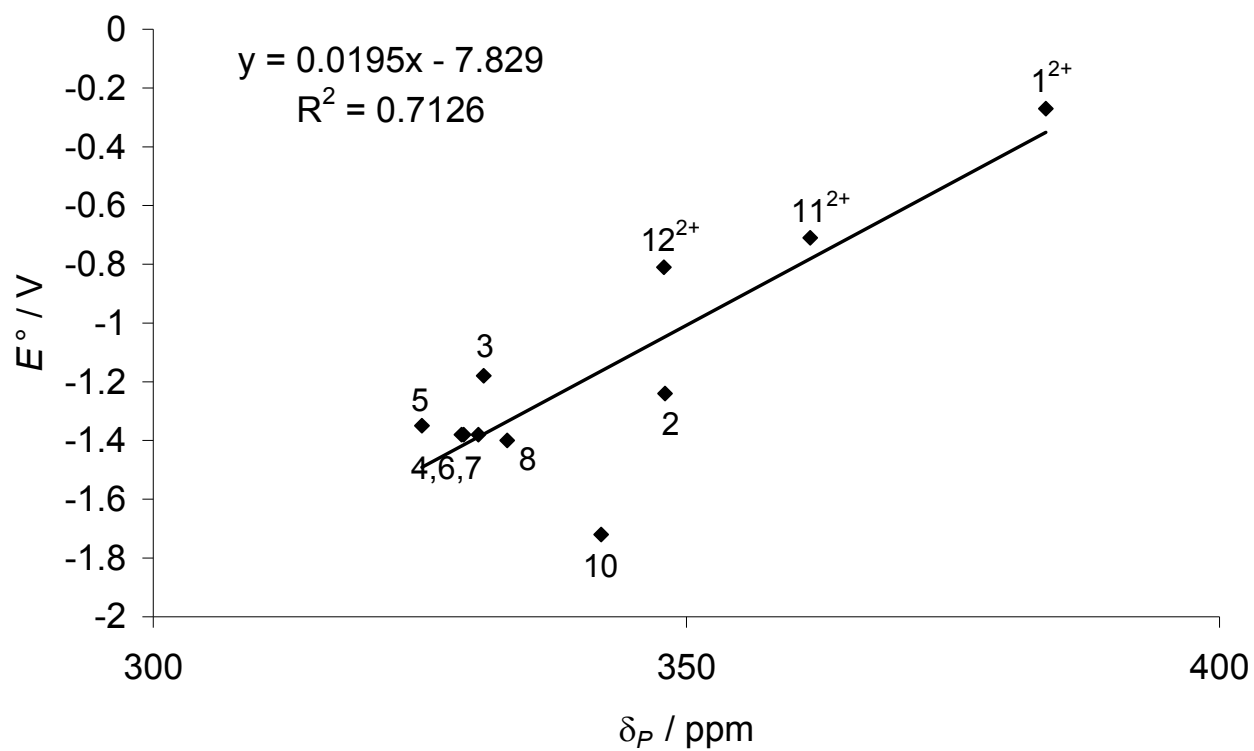

Figure 2S. First reduction potential values for clusters  $[\{\text{Pt}_6\}\text{L}_2]^{n+}$  vs  $^{31}\text{P}\{^1\text{H}\}$  NMR chemical shift.

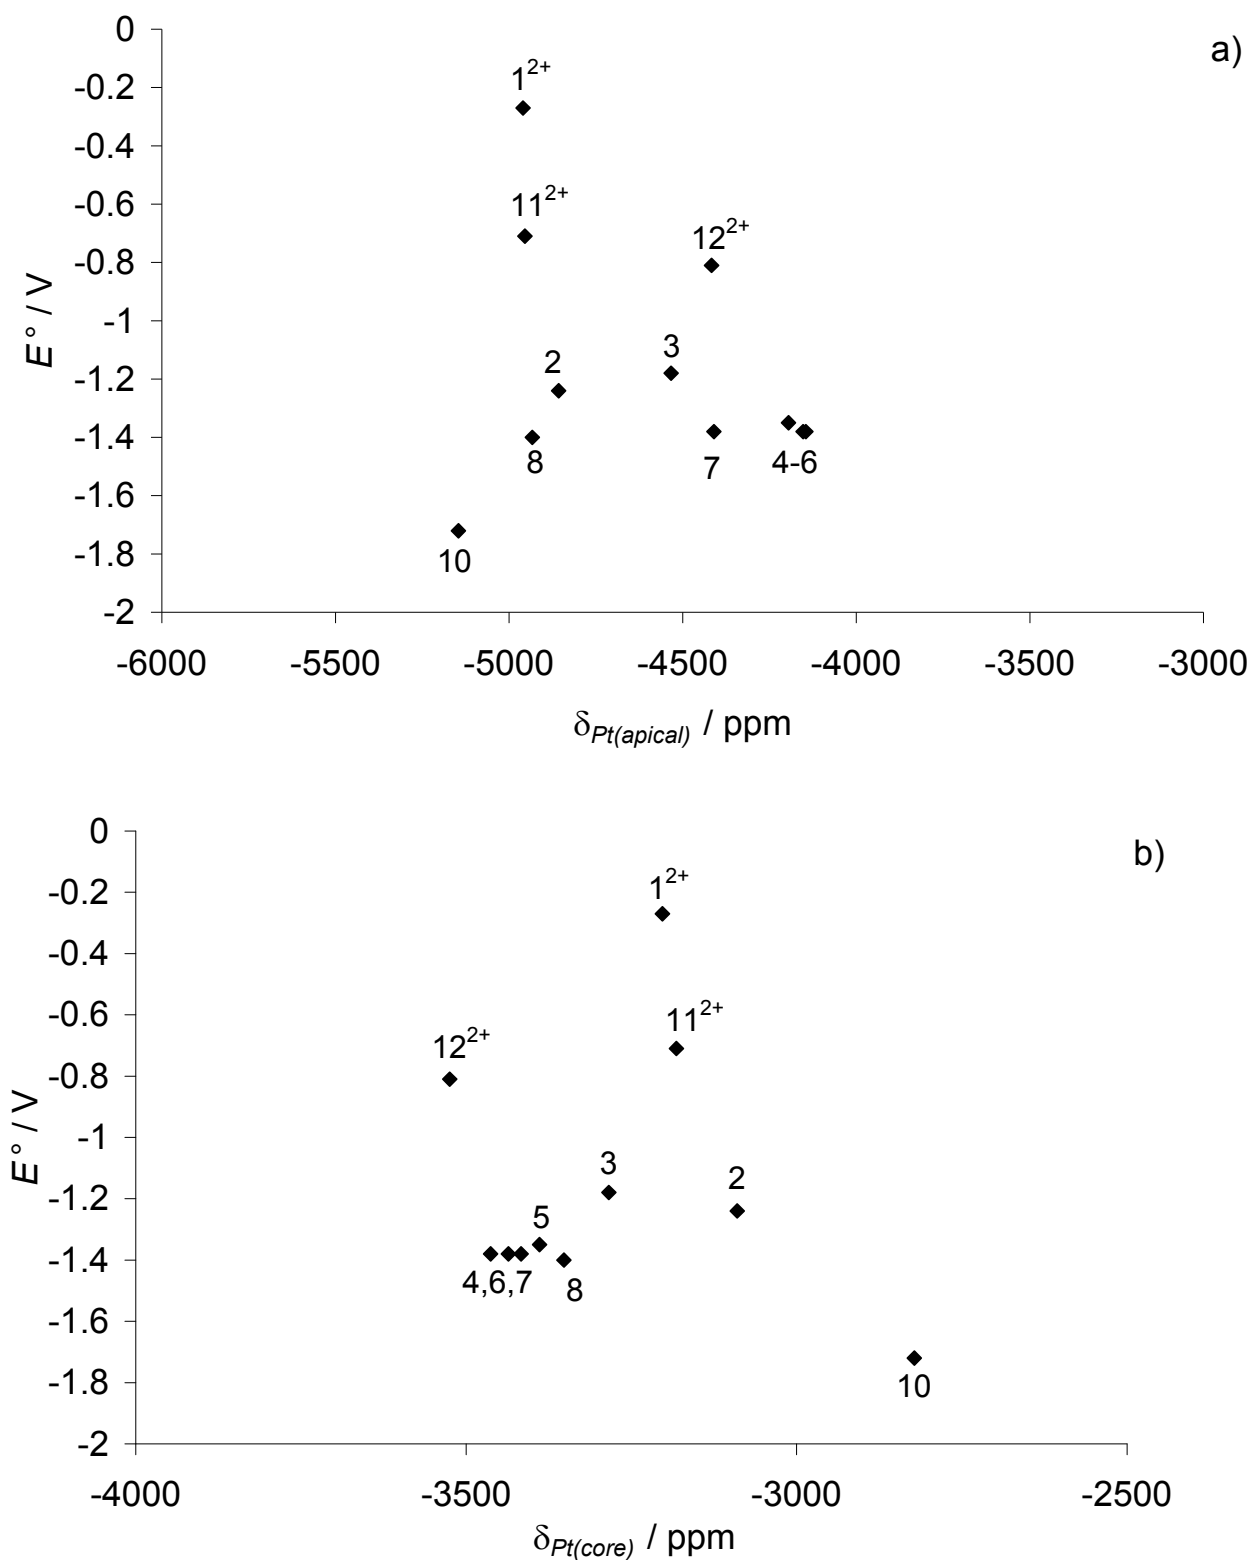

Figure 3S. First reduction potential values for clusters  $[\{\text{Pt}_6\}\text{L}_2]^{n+}$  vs a)  $^{195}\text{Pt}\{^1\text{H}\}$  NMR chemical shift assigned to the two apical Pt nuclei; b)  $^{195}\text{Pt}\{^1\text{H}\}$  NMR chemical shift assigned to the four core Pt nuclei.

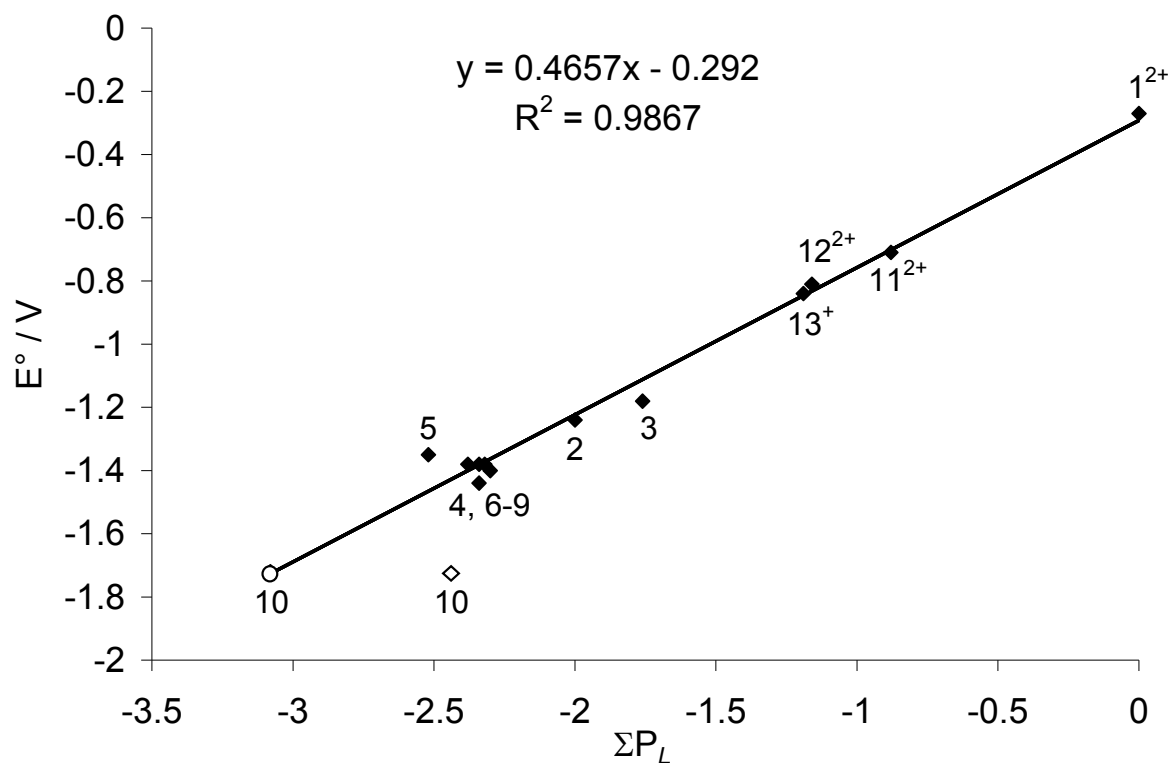

Figure 4S. Correlation between  $\Sigma P_L$  of apical ligands and the redox potential values for the first reduction of clusters  $[\{\text{Pt}_6\}\text{L}_2]^{n+}$ .  $\{\text{Pt}_6\}(\text{H})_2$  has been excluded from the regression and is shown as open symbol. The extrapolated  $2P_L$  for H<sup>+</sup> is shown as an open circle.

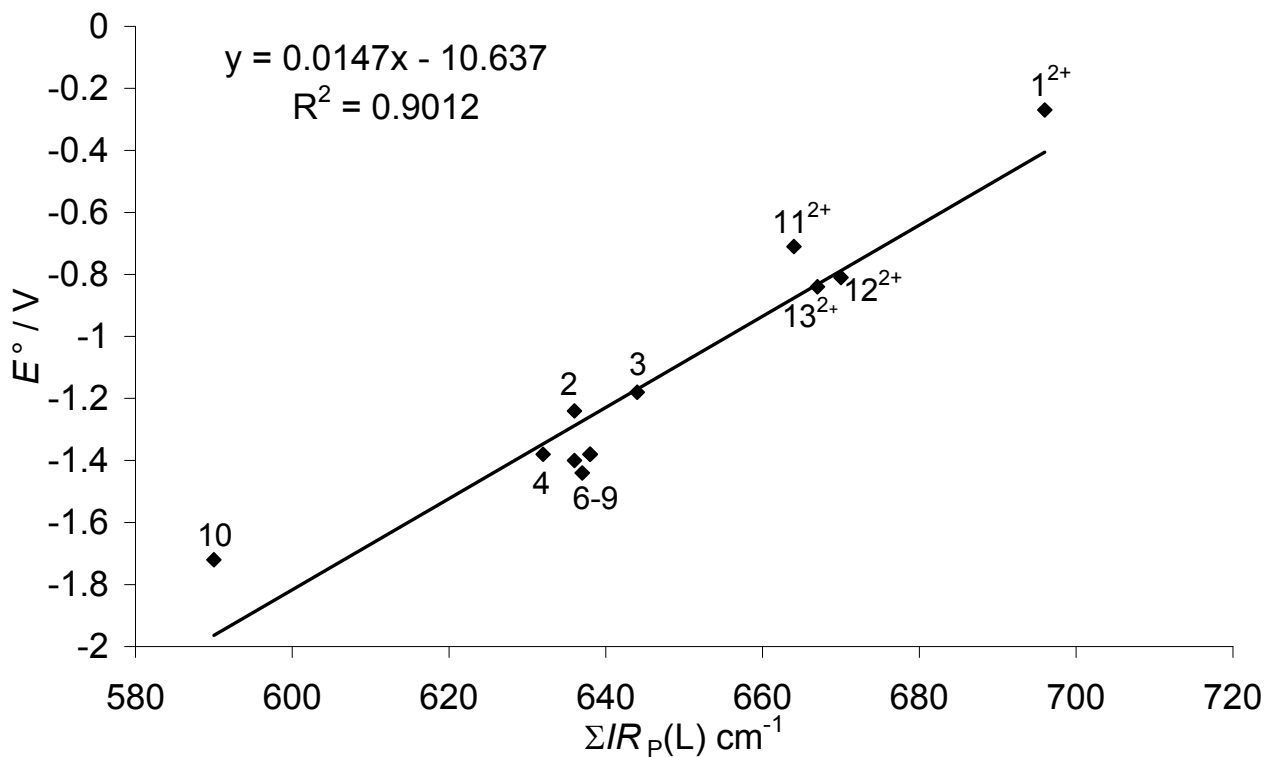

Figure 5S. Correlation between  $\Sigma IR_P(L)$  of apical ligands and the redox potential values for the first reduction of clusters  $[\{\text{Pt}_6\}\text{L}_2]^{n+}$ .
